# Supplementary material
Source: publisher figshare collection journal article supplement (https://frontiersin.figshare.com/ndownloader/files/23547809)
Supplement: Supplementary file [file 23547809]

## Supplementary Material

### 1 Supplementary Figures

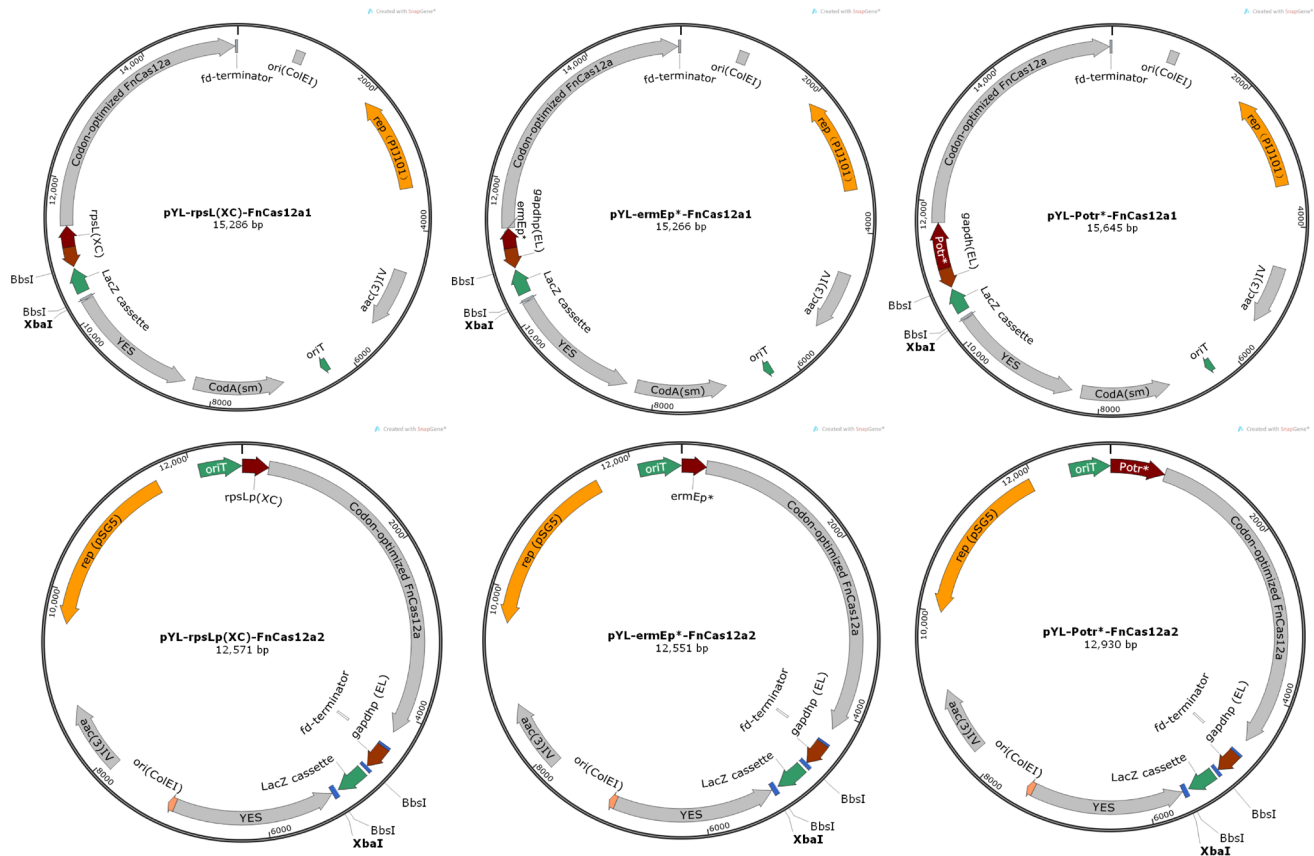

**Supplementary Figure 1.** Plasmids carrying *FnCas12a* with different promoters.

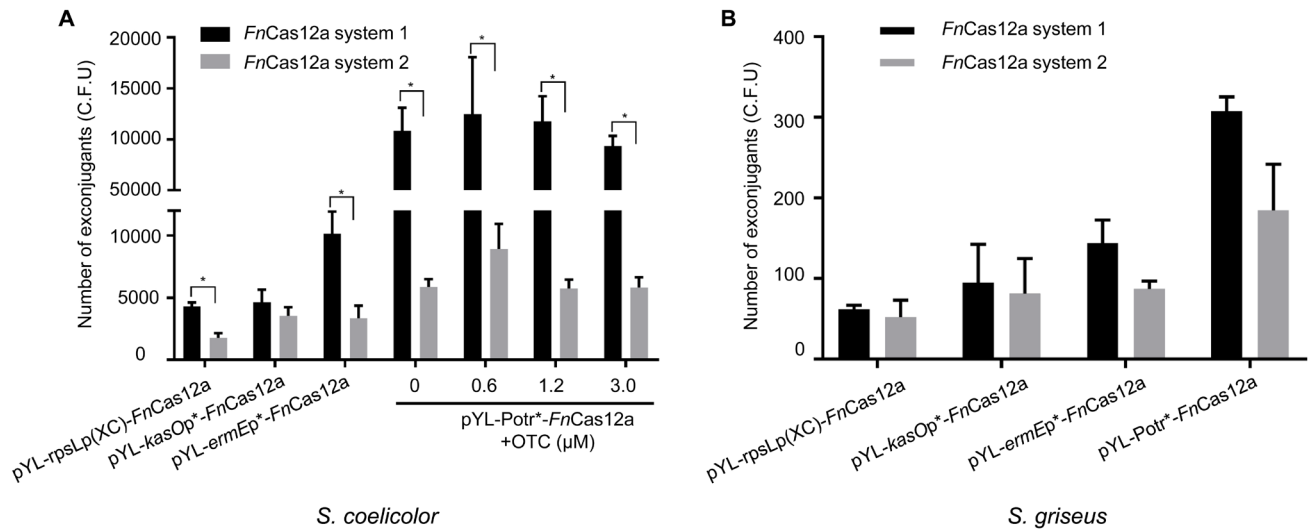

**Supplementary Figure 2.** Comparison of transformation frequencies between the *FnCas12a1* system and the *FnCas12a2* system. \* represents a statistically significant difference. The experiments were performed in triplicate.

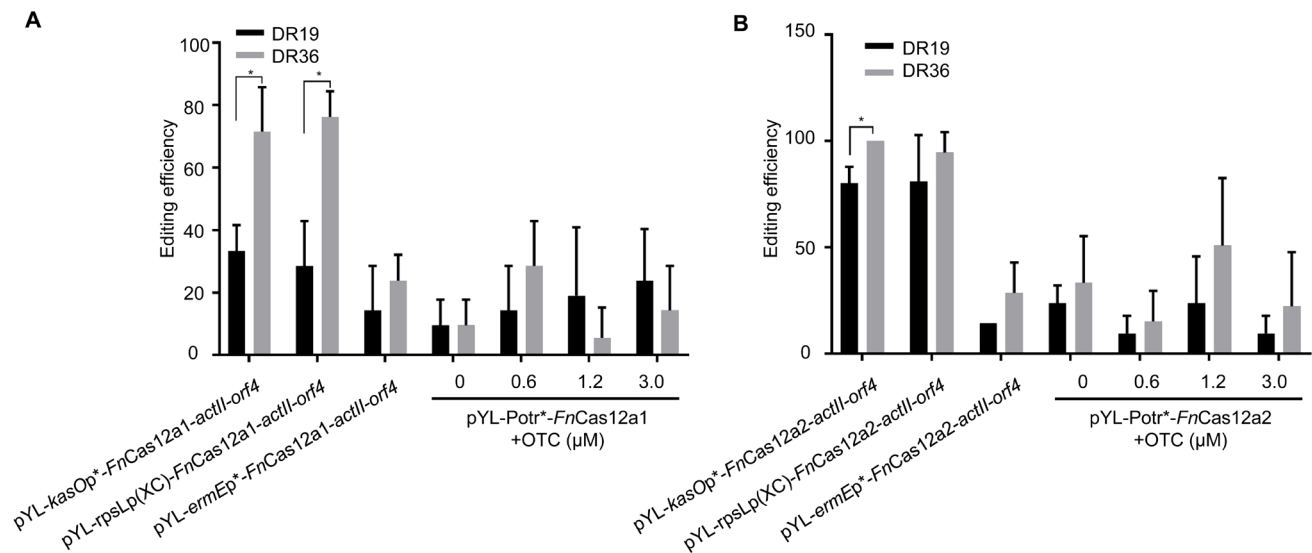

**Supplementary Figure 3.** Comparison of the editing efficiencies of *FnCas12a* systems paired with 19-nt DRs and *FnCas12a* systems paired with 36-nt DRs. \* represents a statistically significant difference. The experiments were performed in triplicate.

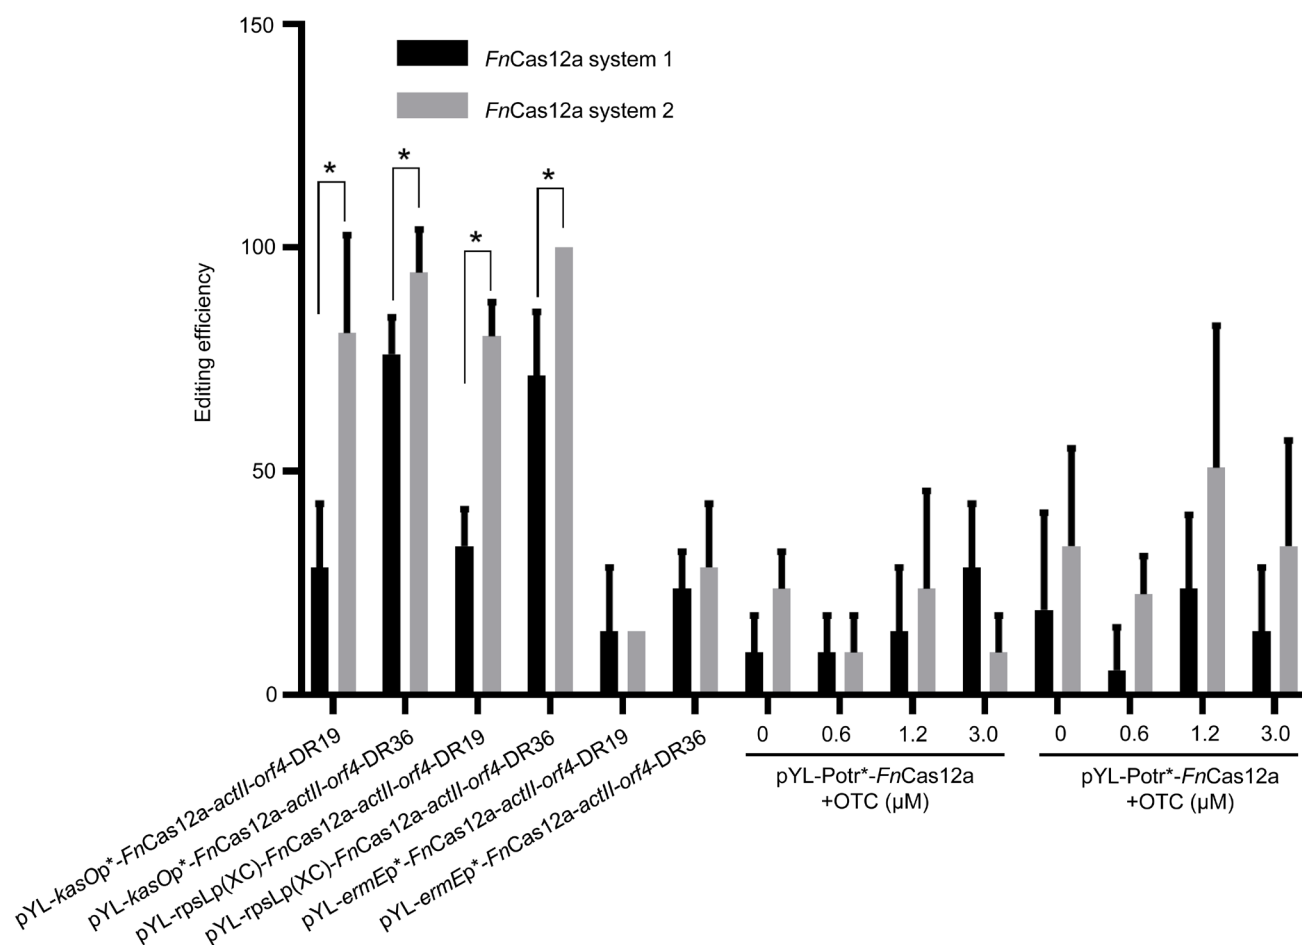

**Supplementary Figure 4.** Comparison of the editing efficiencies between the *FnCas12a*1 system and the *FnCas12a*2 system. \* represents a statistically significant difference. The experiments were performed in triplicate.

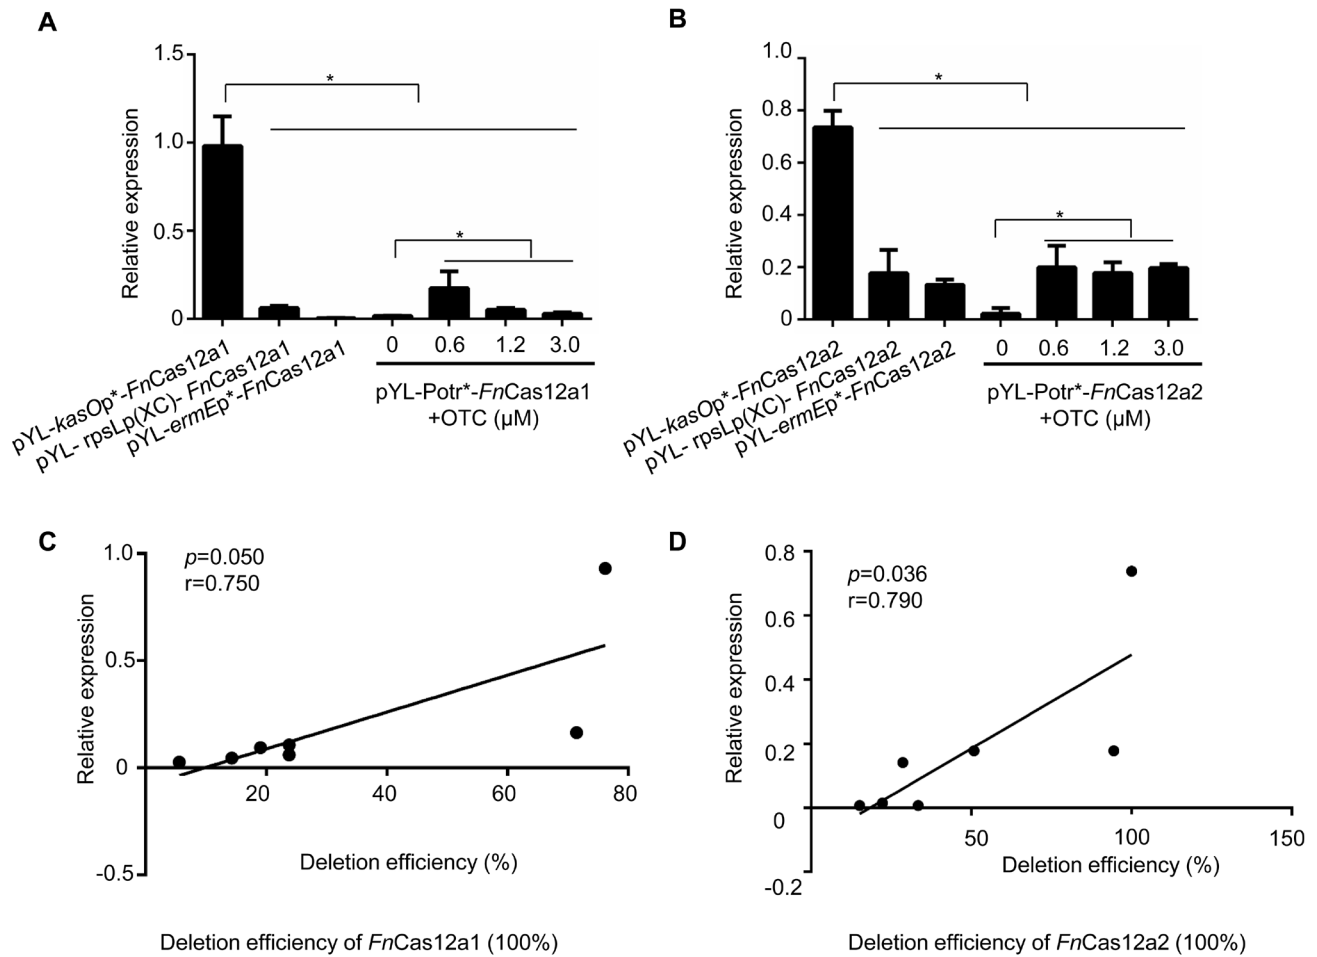

**Supplementary Figure 5.** Correlations between transcription levels and editing efficiencies based on the two *FnCas12a* systems. (A) - (B) Quantitative analyses of the transcription levels of *FnCas12a1* and *FnCas12a2* driven by *rpsLp(XC)*, *kasOp\**, *ermEp\** and *Potr\** in response to OTC in *S. coelicolor*. (C) - (D) Correlation between transcription levels of *FnCas12a1* and *FnCas12a2* systems and their corresponding editing efficiencies. The experiments were performed in triplicate.  $p < 0.05$  represents a statistical significance.

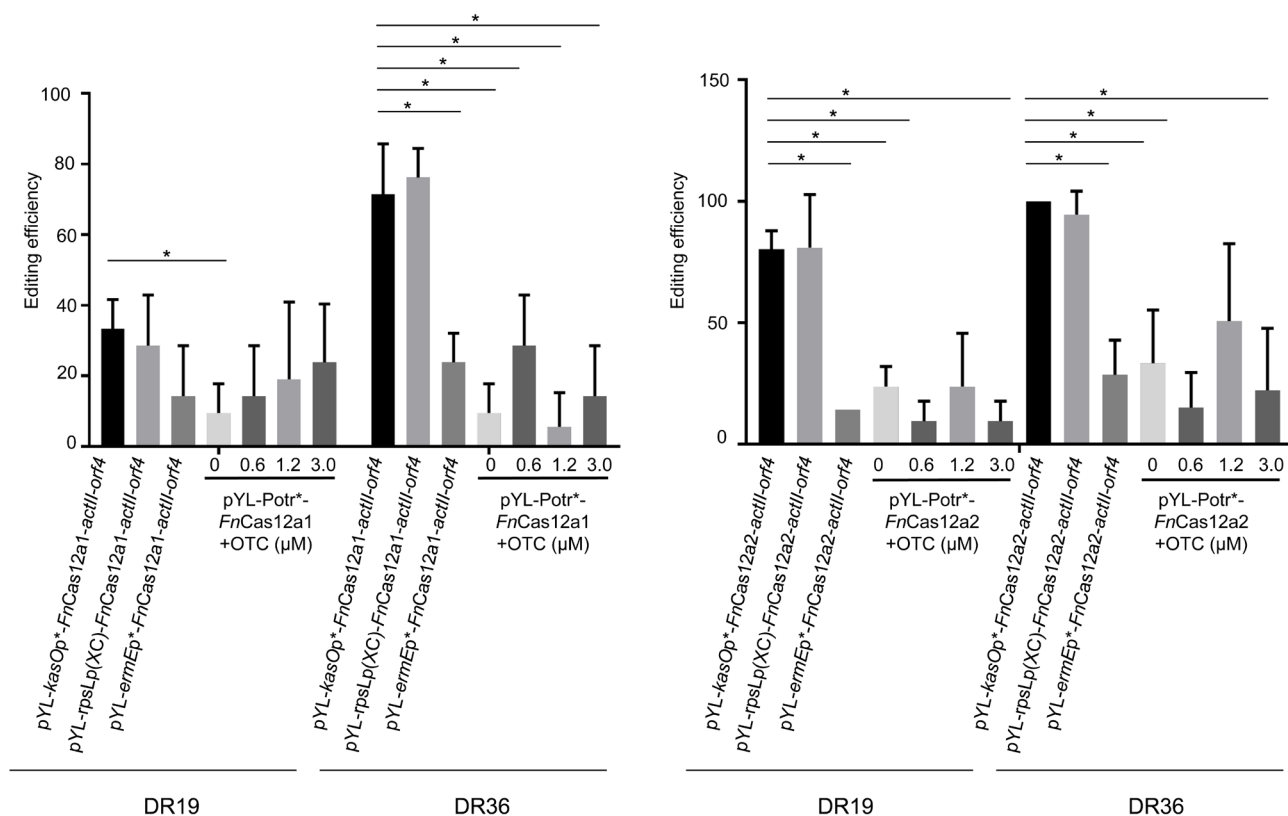

**Supplementary Figure 6.** Graph of the editing efficiencies of the *FnCas12a1* and *FnCas12a2* systems. \* represents a statistically significant difference. The experiments were performed in triplicate.

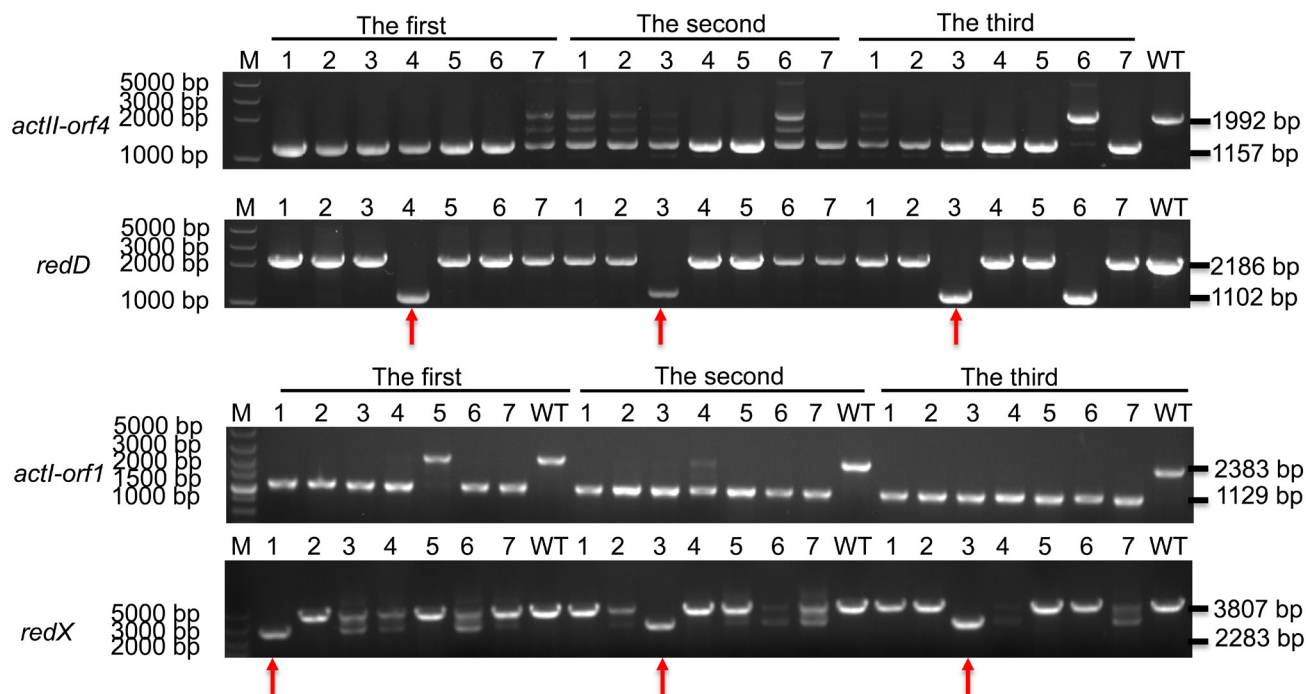

**Supplementary Figure 7.** Evaluation of double deletions via the *FnCas12a2* system. The double-deletion mutants are indicated by red arrows. The experiments were performed in triplicate.

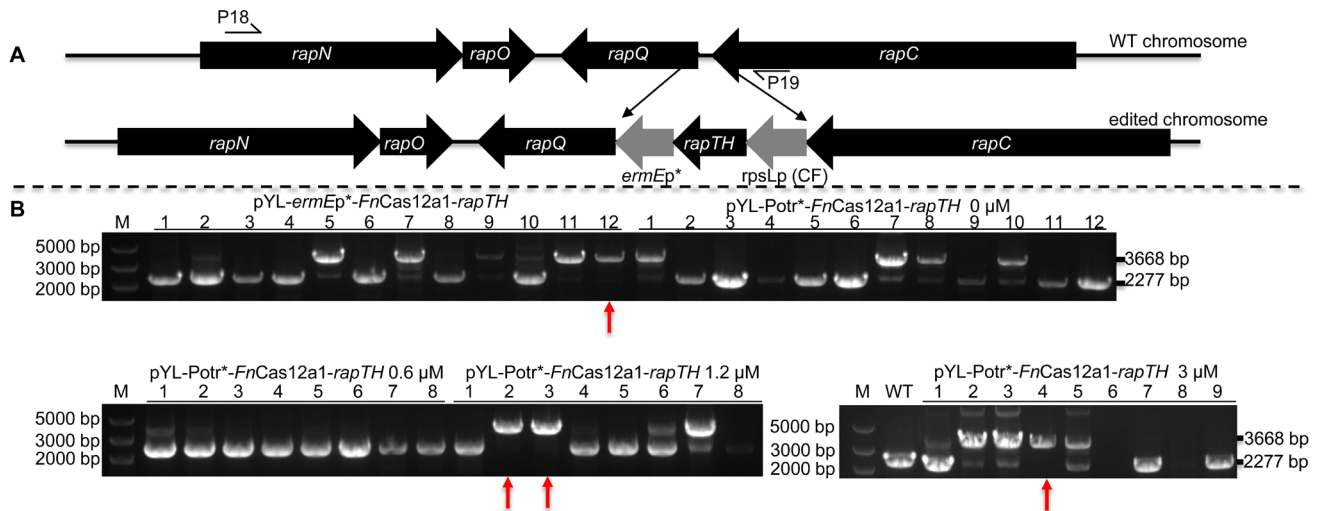

**Supplementary Figure 8.** Evaluation of a single insertion in *Streptomyces hygroscopicus* NRRL 5491. (A) Graphic representation of the recombination process. The *ermEp\** promoter, *RapTH* gene and *rpsLp* (CF) promoter were inserted into the site between *RapQ* and *RapC*. (B) PCR evaluation of the insertions conducted by pYL-*ermEp\**-*FnCas12a1*-*RapTH* and pYL-Potr\*-*FnCas12a1*-*RapTH*. For the strains harboring successful insertions, the primers P18 and P19 generated a 3668-bp amplicon. In contrast, for the wild-type strains, the primers P18 and P19 generated a 2277-bp amplicon. Only one out of twelve strains exhibited successful insertion when using pYL-*ermEp\**-*FnCas12a1*-*RapTH*. The pYL-Potr\*-*FnCas12a1*-*RapTH* plasmid resulted in a higher insertion efficiency when treating with 1.2  $\mu$ M OTC. The successfully edited strains were indicated by red arrows. The experiments were performed in triplicate.

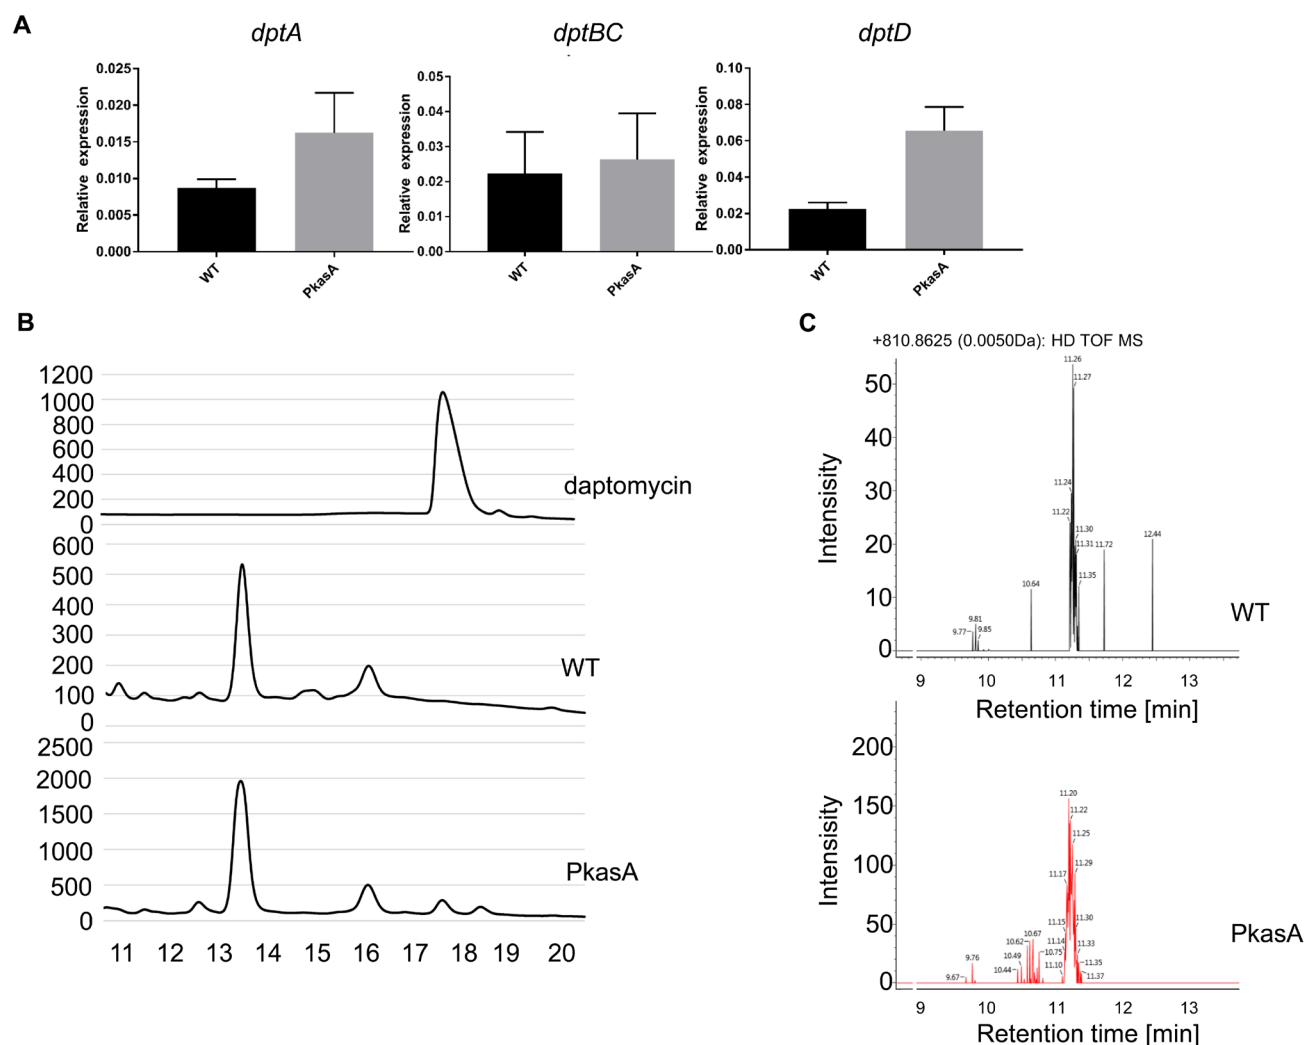

**Supplementary Figure 9.** Evaluation of daptomycin gene cluster activation. (A) Transcription analysis of daptomycin biosynthetic genes followed by the *kasOp\** promoter. (B) HPLC analysis of the daptomycin production. (C) Identification of daptomycin by MS, *m/z*: 810.8625. WT: wild-type, PkasA: *kasOp\** was introduced in front of the NRPS gene in the daptomycin biosynthetic gene cluster in *S. roseosporus*. The experiments were performed in triplicate.

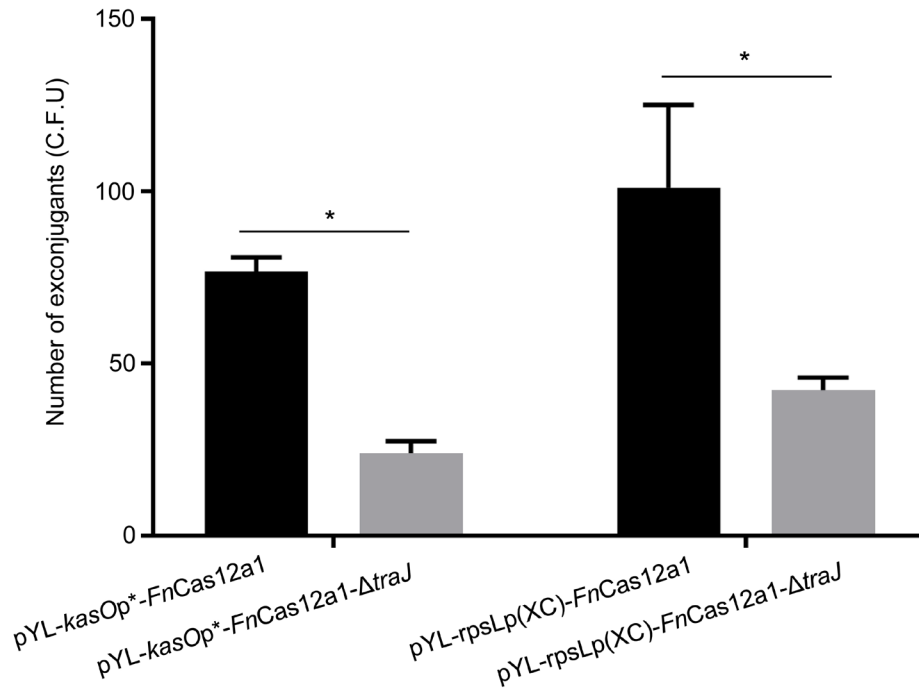

**Supplementary Figure 10.** Transformation frequencies of pYL-*kasOp*\*-*FnCas12a1-ΔtraJ* and pYL-rpsLp(XC)-*FnCas12a1-ΔtraJ*. pYL-*kasOp*\*-*FnCas12a1-ΔtraJ*: *traJ* gene was deleted from pYL-*kasOp*\*-*FnCas12a1*. pYL-rpsLp(XC)-*FnCas12a1-ΔtraJ*: *traJ* gene was deleted from pYL-rpsLp(XC)-*FnCas12a1*. \* represents a statistically significant difference. The experiments were performed in triplicate.



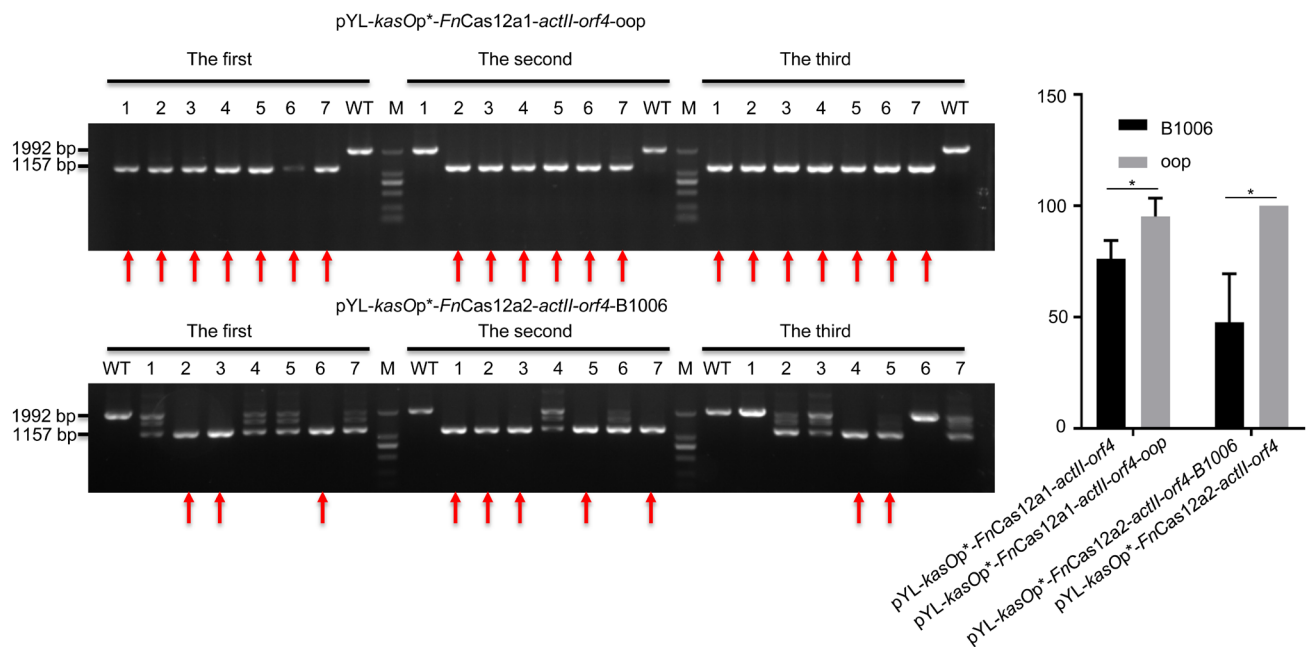

**Supplementary Figure 11.** Evaluation of the *actII-orf4* deletion resulted by pYL-*kasOp*\*-*FnCas12a1-actII-orf4-oop* and pYL-*kasOp*\*-*FnCas12a2-actII-orf4-B1006*. pYL-*kasOp*\*-*FnCas12a1-actII-orf4-oop*: the terminator (B1006) of crRNA in pYL-*kasOp*\*-*FnCas12a1-actII-orf4* was replaced with oop. pYL-*kasOp*\*-*FnCas12a2-actII-orf4-B1006*: the terminator of crRNA (oop) in pYL-*kasOp*\*-*FnCas12a1-actII-orf4* was replaced with B1006. M stands for the DNA marker; and the sizes from top to bottom are: 2000, 1000, 750, 500, 250, 100 bp. \* represents a statistically significant difference. The experiments were performed in triplicate.
